# Supplementary figures and images for: Inflammasome signaling affects anxiety- and depressive-like behavior and gut microbiome composition
Source: PubMed Central journal article supplement — Mol Psychiatry. 2016 Apr 19;21(6):797–805. doi: 10.1038/mp.2016.46 (PMC4879188; doi:10.1038/mp.2016.46), 2016-04-19

**Supplementary Fig S1.**

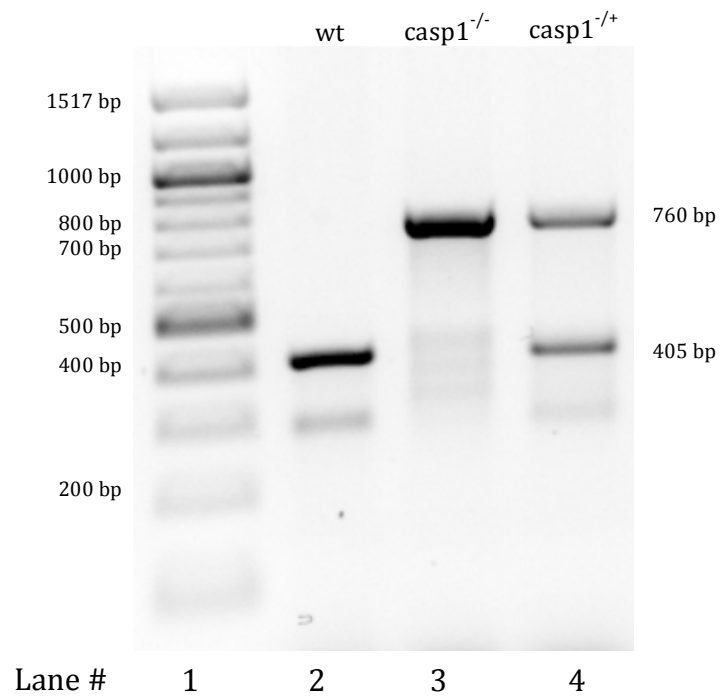

**Supplementary Fig S2.**

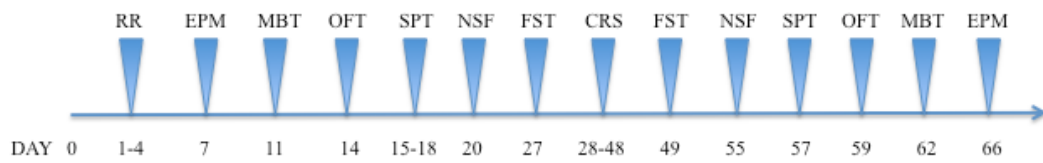

Supplement: mp201646x5.pdf [file mp201646x5.pdf]
